# Supplementary material
Source: publisher site journal article supplement (https://www.dovepress.com/article/219708)
Supplement: Supplementary file 1 [file get_supplementary_file.php]

**Supplementary Table 1** Measured 10-year CVD risk % (mPCE) in each combination of risk factors  
 Values are median (25<sup>th</sup>, 75<sup>th</sup> percentile)

| <b>KoR factors</b>   | <b>n</b> | <b>Women</b>      | <b>n</b> | <b>Men</b>        |
|----------------------|----------|-------------------|----------|-------------------|
| None                 | 2379     | 1.0 (0.5, 2.4)    | 1794     | 3.7 (1.9, 7.7)    |
| HBP only             | 737      | 2.9 (1.2, 8.3)    | 555      | 8.4 (3.8, 16.1)   |
| HC only              | 666      | 1.9 (0.9, 4.8)    | 705      | 5.0 (2.9, 9.5)    |
| DM only              | 73       | 1.9 (1.1, 6.0)    | 55       | 13.3 (7.2, 25.4)  |
| Smoking only         | 529      | 3.3 (2.1, 5.4)    | 477      | 8.1 (5.4, 13.2)   |
| HBP, HC              | 429      | 5.1 (2.3, 11.9)   | 473      | 9.4 (4.9, 16.6)   |
| HBP, DM              | 45       | 8.5 (4.5, 19.8)   | 52       | 21.3 (12.7, 42.9) |
| HBP, smoking         | 138      | 7.6 (3.5, 12.4)   | 127      | 12.4 (8.2, 20.5)  |
| HC, DM               | 41       | 6.7 (2.6, 13.0)   | 30       | 13.7 (6.7, 27.5)  |
| HC, smoking          | 124      | 6.0 (4.2, 9.7)    | 102      | 12.1 (8.4, 17.2)  |
| DM, smoking          | 11       | 5.6 (4.0, 9.3)    | 16       | 21.0 (10.6, 32.4) |
| HBP, HC, DM          | 67       | 10.4 (5.5, 21.6)  | 60       | 24.2 (16.6, 41.8) |
| HBP, HC, smoking     | 59       | 8.2 (5.9, 13.3)   | 66       | 14.2 (9.7, 20.5)  |
| HBP, DM, smoking     | 11       | 17.1 (12.3, 29.7) | 7        | 20.0 (18.4, 44.6) |
| HC, DM, smoking      | 7        | 12.0 (4.4, 16.9)  | 3        | 25.0 (17.1, 36.1) |
| HBP, HC, DM, smoking | 10       | 22.7 (14.9, 30.4) | 8        | 37.6 (27.9, 45.7) |

DM: diabetes (0/1); HBP: hypertension (0/1); HC: high cholesterol (0/1); KoR: Knowledge of Risk factors;  
 mPCE: measured Pooled Cohort Equations 10-year CV risk

**Supplementary Table 2** Models for estimation of pooled cohort equations (mPCE)

10 year CVD risk

All models use log-transformed mPCE as the dependent variable. The final chosen models are highlighted.

| Model specification                                                    | R <sup>2</sup> | AIC   |
|------------------------------------------------------------------------|----------------|-------|
| <b>MEN (n=4,530)</b>                                                   |                |       |
| KoR sum (categorical)                                                  | 0.18           | 11784 |
| KoR sum (categorical) + age                                            | 0.73           | 6699  |
| KoR sum (categorical) + age + age <sup>2</sup>                         | 0.74           | 6639  |
| HBP + HC + DM + SM                                                     | 0.21           | 11591 |
| HBP + HC + DM + SM + age                                               | 0.80           | 5387  |
| HBP + HC + DM + SM + age + age <sup>2</sup>                            | 0.80           | 5283  |
| HBP + HC + DM + SM + age + age <sup>2</sup> + age*(HBP + HC + DM + SM) | 0.82           | 4846  |
| HBP + HC + DM + SM + age + age <sup>2</sup> + age*(HC + SM)            | 0.82           | 4843  |
| <b>WOMEN (n=5,326)</b>                                                 |                |       |
| KoR sum (categorical)                                                  | 0.26           | 16040 |
| KoR sum (categorical) + age                                            | 0.80           | 9150  |
| KoR sum (categorical) + age + age <sup>2</sup>                         | 0.80           | 9105  |
| HBP + HC + DM + SM                                                     | 0.26           | 15982 |
| HBP + HC + DM + SM + age                                               | 0.85           | 7504  |
| HBP + HC + DM + SM + age + age <sup>2</sup>                            | 0.85           | 7437  |
| HBP + HC + DM + SM + age + age <sup>2</sup> + age*(HBP + HC + DM + SM) | 0.87           | 6893  |
| HBP + HC + DM + SM + age + age <sup>2</sup> + age*(HC + SM)            | 0.87           | 6904  |

AIC: Akaike's Information Criterion, lower values indicate better fit of data to model; DM: diabetes (0/1); HBP: hypertension (0/1); HC: high cholesterol (0/1); KoR: knowledge of risk factors; KoR sum: sum of risk factors, range 0-4; mPCE: measured Pooled Cohort Equations CV 10-year risk; SM: smoking (0/1)

KoR sum (categorical): KoR sum (0, 1, 2, 3 or 4) treated as one categorical variable with 4 levels  
Interaction terms: age\*(HBP + HC + DM + SM): age\*HBP + age\*HC + age\*DM + age\*SM

**Supplementary Table 3** Regression coefficients for estimation of log-transformed mPCE from knowledge of risk factors and age

| <b>Model parameters</b> | <b>Women</b>                   | <b>Men</b>                       |
|-------------------------|--------------------------------|----------------------------------|
| HBP                     | 0.558 (0.398, 0.718)           | 0.219 (0.191, 0.246)             |
| HC                      | 0.944 (0.781, 1.107)           | 0.620 (0.472, 0.767)             |
| DM                      | 1.00614 (0.681, 1.331)         | 0.578 (0.522, 0.633)             |
| Smoking                 | 3.373 (3.178, 3.568)           | 2.930 (2.737, 3.123)             |
| Age (years)             | 0.0546 (0.0405, 0.0688)        | 0.184 (0.171, 0.198)             |
| Age <sup>2</sup>        | 0.000494 (0.000368, 0.000620)  | -0.000848 (-0.000972, -0.000725) |
| HBP*age                 | -0.00288 (-0.00570, -0.000686) | -                                |
| HC*age                  | -0.0136 (-0.0165, -0.0108)     | -0.00954 (-0.0122, -0.00684)     |
| DM*age                  | -0.00542 (-0.0111, 0.000237)   | -                                |
| Smoking*age             | -0.0421 (-0.0457, -0.0383)     | -0.0398 (-0.0436, -0.0361)       |
| Intercept               | -4.015 (-4.405, -3.626)        | -5.795 (-6.181, -5.410)          |

DM: diabetes (0/1); HBP: hypertension (0/1); HC: high cholesterol (0/1); mPCE: measured Pooled Cohort Equations CV 10-year risk

Example: The 10-year ePCE risk for women can be calculated as  $\exp(\sum \beta X - 4.02)$  where  $\beta$  is the regression coefficient and X is the level for each KoR factor
